# Supplementary material for: Bovine serum albumin assisted preparation of ultra-stable gold nanoflowers and their selective Raman response to charged dyes
Source: Royal Society of Chemistry journal article supplement (doi:10.1039/c9ra04852a), 2019-01-01
Supplement: c9ra04852a1.pdf [file c9ra04852a1.pdf]

## Supplementary Information

### Bovine serum albumin assisted preparation of ultra-stable gold nanoflowers and their selective Raman response to charged dyes

Xiaoyu Zhang,<sup>a</sup> Yandong Han,<sup>b</sup> Zihao Xing,<sup>a</sup> Zhenzhen Huang,<sup>a</sup> Renguo Xie<sup>a</sup> and Wensheng Yang<sup>\*,a</sup>

<sup>a</sup>State Key Laboratory of Inorganic Synthesis and Preparative Chemistry, Jilin University, Changchun 130012, China

<sup>b</sup>Institute of Molecular Plus, Tianjin University, Tianjin 300072, China

E-mail: [wsyang@jlu.edu.cn](mailto:wsyang@jlu.edu.cn)

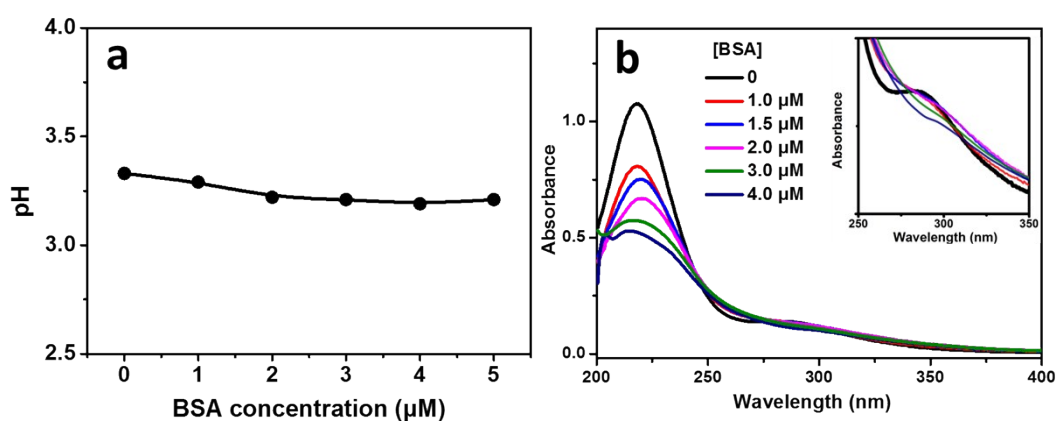

**Fig. S1** (a) Variation in pH and (b) UV-visible spectra of the 0.25 mM  $\text{HAuCl}_4$  solution with different concentrations of BSA taken after 1 h incubation, using corresponding pure BSA solutions as references. Inset of b: enlargement of the 250-350 nm window. The pH of the solution only changed slightly after the addition of BSA, *i.e.*, decreased from ca. 3.3 to 3.2 after the addition of 5.0  $\mu\text{M}$  BSA. The solution of  $\text{HAuCl}_4$  presented two bands at 220 and 291 nm in absence of BSA. After the addition of BSA, intensity of the band at 220 nm decreased gradually, and that of the band at 291 nm disappeared finally, attributed to the gradual replacement of chloride ions by the functional groups (mainly carboxyl groups) of BSA.

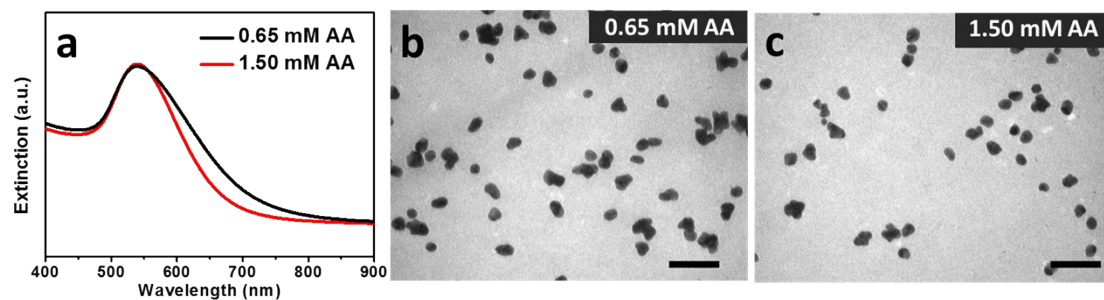

**Fig. S2** (a) UV-vis spectra of Au NPs synthesized with 1.0  $\mu\text{M}$  BSA at AA concentrations of 0.65 and 1.50 mM. TEM images of Au NPs obtained at AA concentrations of (b) 0.65 mM and (c) 1.50 mM. The scale bars were 100 nm.

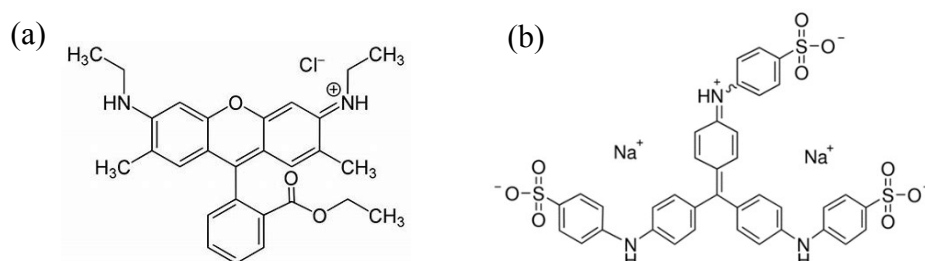

**Fig. S3** The structures of (a) Rhodamine 6G and (b) methyl blue.

**Table S1** Assignments of Raman bands of Rhodamine 6G in SERS spectra

| Bands<br>( $\text{cm}^{-1}$ ) | Assignment              |
|-------------------------------|-------------------------|
| 1649                          | aromatic C-C stretching |
| 1510                          | aromatic C-C stretching |
| 1363                          | aromatic C-C stretching |
| 1310                          | N-H bending             |
| 1185                          | C=C stretching          |

**Table S2** Assignments of Raman bands of methyl blue in SERS spectra

| <b>Bands</b><br>( $\text{cm}^{-1}$ ) | <b>Assignment</b>                               |
|--------------------------------------|-------------------------------------------------|
| 1595                                 | C-phenyl in-plane antisymmetric stretching      |
| 1361                                 | C-N, Phenyl-C-phenyl antisymmetric stretching   |
| 1179                                 | C-phenyl, C-H in-plane antisymmetric stretching |
| 919                                  | Phenyl ring breathing mode                      |

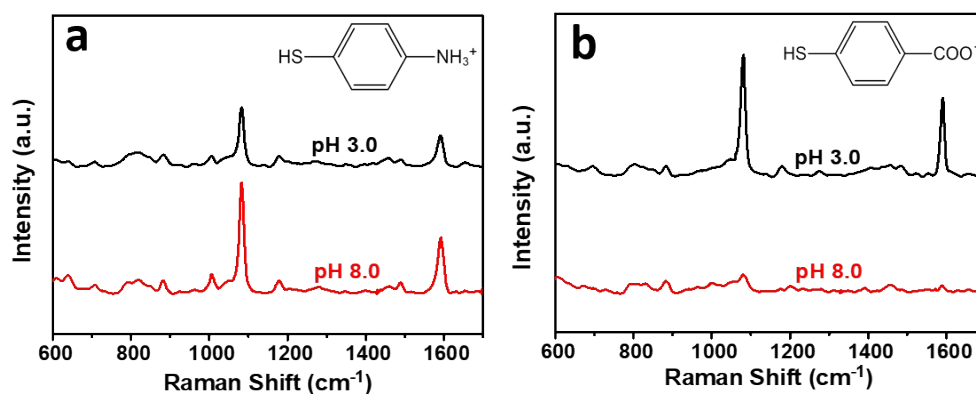

**Fig. S4** SERS spectra of (a) 4-aminothiophenol and (b) 4-mercaptobenzoic acid at pH 3.0 and 8.0, recorded after being mixed with the Au nanoflower hydrosols prepared with 3.0  $\mu\text{M}$  BSA for 20 min. It was obvious that the Raman signals of 4-aminothiophenol were detectable even at pH 3.0 and these of 4-mercaptobenzoic acid were observable even at pH 8.0, possibly attributed to the strong affinity of the thiol group to the Au particle surface.
